# Supplementary material
Source: publisher site journal article supplement (https://www.dovepress.com/article/415378)
Supplement: Supplementary file 1 [file get_supplementary_file.php]

Table S1.Changes in the expression of mesenchymal-epithelial markers in THLE-3, HepG2, C3A and SNU-449 (t-test).

| Cell Line | Gene | Groups | | T-test | |
| --- | --- | --- | --- | --- | --- |
| Control | Fullerenol C60(OH)40 |
| SE | p-value |
| HepG2 | *snail* | 0 | -1.913* | 0.389 | 0.0161 |
| *e-cadherin* | 0 | 0.554** | 0.072 | 0.0015 |
| *n-cadherin* | 0 | 0.656 | 0.246 | 0.0561 |
| *vimentin* | 0 | 2.558*** | 0.275 | 0.0007 |
| *smad2* | 0 | -1.182*** | 0.136 | 0.0010 |
| *smad3* | 0 | -1.503** | 0.283 | 0.0060 |
| *smad4* | 0 | 1.482*** | 0.125 | 0.0003 |
| *tgfr1* | 0 | -0.280 | 0.274 | 0.3656 |
| *tgfr2* | 0 | -1.417*** | 0.085 | 0.0001 |
| C3A | *snail* | 0 | -2.282** | 0.293 | 0.0015 |
| *e-cadherin* | 0 | 1.042** | 0.146 | 0.0020 |
| *n-cadherin* | 0 | 0.689* | 0.165 | 0.0138 |
| *vimentin* | 0 | 2.899*** | 0.326 | 0.0009 |
| *smad2* | 0 | -0.672** | 0.131 | 0.0069 |
| *smad3* | 0 | -1.111** | 0.232 | 0.0087 |
| *smad4* | 0 | 1.800*** | 0.132 | 0.0002 |
| *tgfr1* | 0 | 0.106 | 0.137 | 0.4826 |
| *tgfr2* | 0 | -0.866* | 0.276 | 0.0348 |
| SNU-449 | *snail* | 0 | 0.252* | 0.086 | 0.0432 |
| *e-cadherin* | 0 | 4.764*** | 0.328 | 0.0001 |
| *n-cadherin* | 0 | -0.425 | 0.236 | 0.1218 |
| *vimentin* | 0 | -3.747*** | 0.332 | 0.0004 |
| *smad2* | 0 | 0.093 | 0.177 | 0.6189 |
| *smad3* | 0 | -0.719** | 0.159 | 0.0040 |
| *smad4* | 0 | -5.454*** | 0.206 | 0.0000 |
| *tgfr1* | 0 | 0.941 | 0.414 | 0.0632 |
| *tgfr2* | 0 | -0.255 | 0.147 | 0.1340 |

The results are presented as FC values, and untreated cells are depicted as 0. Values above/below 0 indicate upregulation/downregulation of gene expression. Differences with a p-value ≤ 0.05 were defined as statistically significant compared to the control group: one asterisk (*), p-value ≤ 0.05; two asterisks (**), p-value ≤  0.01; three asterisks (***), p-value ≤  0.001. Abbreviations: FC, fold change
